# Supplementary material
Source: HighWire-hosted journal article supplement (https://erj.ersjournals.com/content/58/4/2004613)
Supplement: inline-supplementary-material-1 [file inline-supplementary-material-1.pdf]

Supplementary Table S1 – Search Strategy (MEDLINE)

|    | Search Terms                                                           |
|----|------------------------------------------------------------------------|
| 1  | exp advance care planning/                                             |
| 2  | exp attitude to death/                                                 |
| 3  | exp bereavement/                                                       |
| 4  | Death/                                                                 |
| 5  | Hospices/                                                              |
| 6  | Life Support Care/                                                     |
| 7  | Palliative Care/                                                       |
| 8  | exp terminal care/                                                     |
| 9  | Terminally Ill/                                                        |
| 10 | palliat\$.af.                                                          |
| 11 | hospice\$.af.                                                          |
| 12 | terminal care.af.                                                      |
| 13 | or/1-12                                                                |
| 14 | journal of palliative care.jn.                                         |
| 15 | journal of palliative medicine.jn.                                     |
| 16 | hospice journal physical psychosocial & pastoral care of the dying.jn. |
| 17 | supportive care in cancer.jn.                                          |
| 18 | palliative medicine.jn.                                                |
| 19 | palliative & supportive care.jn.                                       |
| 20 | journal of supportive oncology.jn.                                     |
| 21 | journal of social work in end of life & palliative care.jn.            |
| 22 | journal of pain & symptom management.jn.                               |
| 23 | journal of pain & palliative care pharmacotherapy.jn.                  |
| 24 | international journal of palliative nursing.jn.                        |
| 25 | death studies.jn.                                                      |
| 26 | death education.jn.                                                    |
| 27 | american journal of hospice care.jn.                                   |
| 28 | american journal of hospice & palliative medicine.jn.                  |
| 29 | omega journal of death & dying.jn.                                     |
| 30 | or/14-29                                                               |
| 31 | 13 or 30                                                               |
| 32 | dyspnea.mp. or Dyspnea/                                                |
| 33 | dyspnoea.mp.                                                           |
| 34 | breathlessness.mp.                                                     |
| 35 | shortness of breath.mp.                                                |
| 36 | Oxygen/ or oxygen.mp.                                                  |
| 37 | Oxygen Inhalation Therapy/ or long-term oxygen therapy.mp.             |
| 38 | supplemental oxygen.mp.                                                |
| 39 | home oxygen.mp.                                                        |
| 40 | domiciliary oxygen.mp.                                                 |
| 41 | 32 or 33 or 34 or 35                                                   |
| 42 | 36 or 37 or 38 or 39 or 40                                             |
| 43 | 31 and 41 and 42                                                       |
| 44 | limit 43 to yr="2000 -Current"                                         |
| 45 | limit 44 to english language                                           |
