# Supplementary material
Source: HighWire-hosted journal article supplement (https://erj.ersjournals.com/content/58/4/2004613)
Supplement: inline-supplementary-material-2 [file inline-supplementary-material-2.pdf]

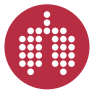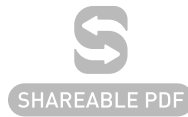

# Perspectives on palliative oxygen for breathlessness: systematic review and meta-synthesis

Slavica Kochovska<sup>1,4</sup>, Diana H. Ferreira<sup>2,4</sup>, Maja V. Garcia<sup>1</sup>, Jane L. Phillips <sup>1</sup> and David C. Currow<sup>1,3</sup>

<sup>1</sup>IMPACCT, Faculty of Health, University of Technology Sydney, Sydney, Australia. <sup>2</sup>Palliative and Supportive Services, Flinders University, Adelaide, Australia. <sup>3</sup>Wolfson Palliative Care Research Centre, University of Hull, Hull, UK. <sup>4</sup>These authors are joint first authors.

Corresponding author: David C. Currow ([david.currow@uts.edu.au](mailto:david.currow@uts.edu.au))

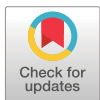

Shareable abstract (@ERSpublications)

**Patients', caregivers' and clinicians' differing perceptions of the benefits and burdens of palliative oxygen should be considered when defining the goals of therapy and determining clinically relevant interventions offered for chronic breathlessness** <http://bit.ly/2ZE285P>

**Cite this article as:** Kochovska S, Ferreira DH, Garcia MV, *et al.* Perspectives on palliative oxygen for breathlessness: systematic review and meta-synthesis. *Eur Respir J* 2021; 58: 2004613 [DOI: 10.1183/13993003.04613-2020].

This single-page version can be shared freely online.

Copyright ©The authors 2021. For reproduction rights and permissions contact [permissions@ersnet.org](mailto:permissions@ersnet.org)

This article has supplementary material available from [erj.ersjournals.com](http://erj.ersjournals.com)

This article has an editorial commentary: <https://doi.org/10.1183/13993003.00775-2021>

Received: 24 Sept 2020  
Accepted: 15 Feb 2021

## Abstract

Oxygen therapy is frequently prescribed for the palliation of breathlessness, despite lack of evidence for its effectiveness in people who are not hypoxaemic. This study aimed to compare and contrast patients', caregivers' and clinicians' experiences of palliative oxygen use for the relief of chronic breathlessness in people with advanced life-limiting illnesses, and how this shapes prescribing.

A systematic review and meta-synthesis of qualitative data was conducted. MEDLINE, CINAHL and PsycINFO were searched for peer-reviewed studies in English (2000–April 2019) reporting perspectives on palliative oxygen use for reducing breathlessness in people with advanced illnesses in any healthcare setting. After data extraction, thematic synthesis used line-by-line coding of raw data (quotes) to generate descriptive and analytical themes.

Of 457 articles identified, 22 met the inclusion criteria by reporting perspectives of patients (n=337), caregivers (n=91) or clinicians (n=616). Themes common to these perspectives were: 1) benefits and burdens of palliative oxygen use, 2) knowledge and perceptions of palliative oxygen use beyond the guidelines, and 3) longitudinal trajectories of palliative oxygen use.

There are differing perceptions regarding the benefits and burdens of using palliative oxygen. Clinicians should be aware that oxygen use may generate differing goals of therapy for patients and caregivers. These perceptions should be taken into consideration when prescribing oxygen for the symptomatic relief of chronic breathlessness in patients who do not qualify for long-term oxygen therapy.
